# Supplementary material for: Small and big Hodgkin-Reed-Sternberg cells of Hodgkin lymphoma cell lines L-428 and L-1236 lack consistent differences in gene expression profiles and are capable to reconstitute each other
Source: PLOS journal article supplement (doi:10.1371/journal.pone.0177378), 2017-05-15

**A**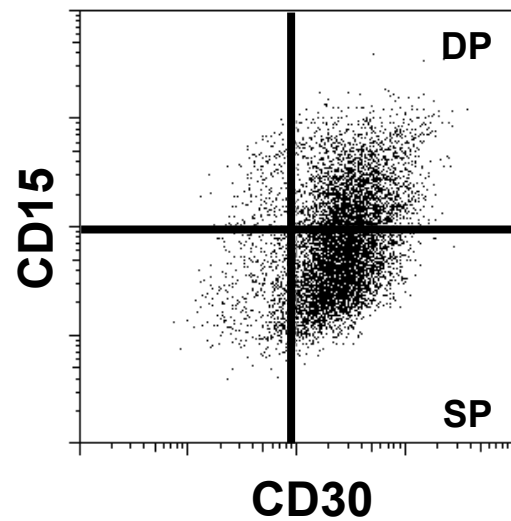**B**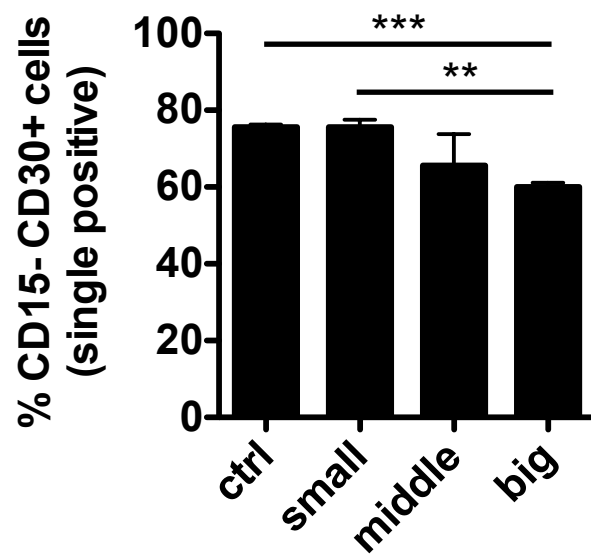**C**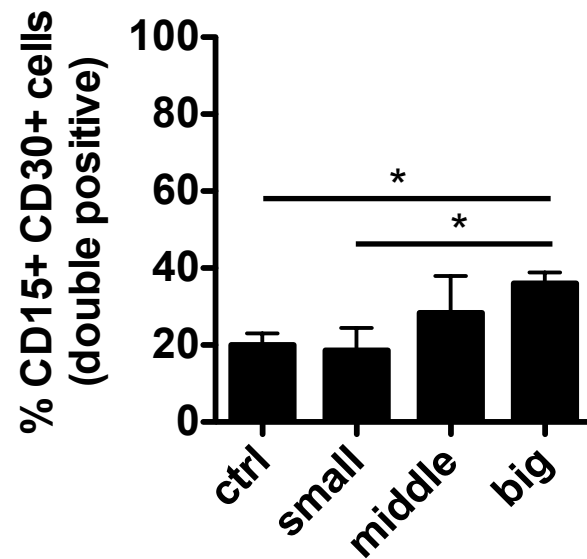**D**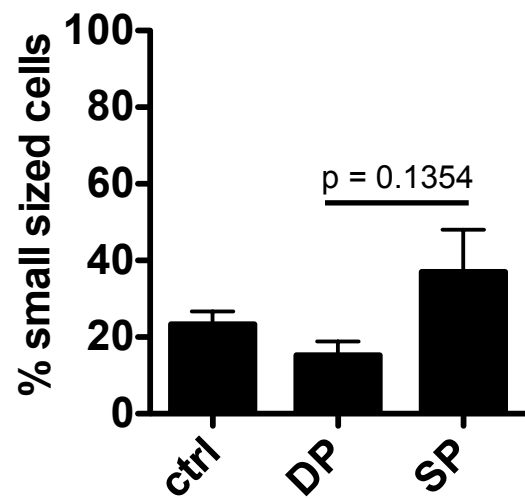**E**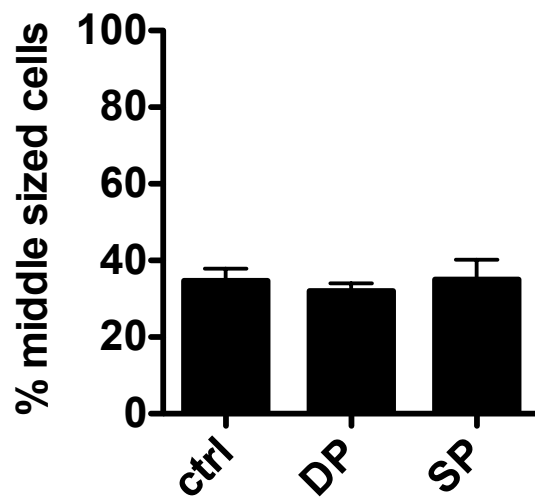**F**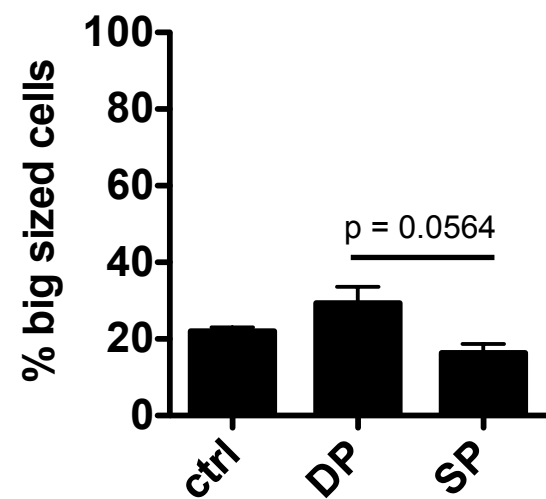

Supplement: S1 (10.1371/journal.pone.0177378.s001) [file journal.pone.0177378.s001.pdf]
